# Supplementary material
Source: PubMed Central journal article supplement (PMC5107311)
Supplement: NIHMS827380-supplement-Appendices.pdf [file NIHMS827380-supplement-Appendices.pdf]

## Appendix 1. NIH Toolbox Cognition Battery in Spanish Raw to Scaled Score Conversions.

**Appendix 1.** Illustrated below are look up tables converting raw Spanish NIH Toolbox Cognition Battery scores into normalized scaled scores (M=10, SD=3). The normalized scaled scores are for application in the age- and fully demographically-corrected formulas presented in Appendix 2. To use, select the scaled score table appropriate for the correction desired (age- or fully-corrected) and demographics (i.e., adult or child) of the given individual. The scaled score is then entered into the appropriate Appendix 2 formula in order to derive the desired corrected score.

### **Raw Score indicates:**

DCCS – computed score

Picture Sequence Memory – computed score

Pattern Comparison – raw score

Picture Vocabulary – theta score

Flanker – computed score

List Sort – raw score

Oral Reading – theta score

**Appendix 1. NIH Toolbox Cognition Battery in Spanish Raw to Scaled Score Conversions.**

**Raw to Scaled Score for use in Age- and Fully-corrected Formulas**

**Spanish Adults (18-85 years old)**

| SS        | DCCS          | Flanker       | List Sort | Picture Sequence<br>Memory | Pattern<br>Comparison | Oral Reading  | Picture Vocabulary | SS        |
|-----------|---------------|---------------|-----------|----------------------------|-----------------------|---------------|--------------------|-----------|
| <b>1</b>  | 0.0-2.0054    | 0.0-2.2167    | 0-2       | 200.0-240.57               | 0-19                  | -15.0- -12.27 | -15.0- -3.29       | <b>1</b>  |
| <b>2</b>  | 2.0055-2.0450 | 2.2168-3.5511 | 3-5       | 240.58-302.92              | 20-24                 | -12.26- -8.55 | -3.28- -2.53       | <b>2</b>  |
| <b>3</b>  | 2.0451-2.0846 | 3.5512-3.8782 | 6         | 302.93-314.85              | 25-27                 | -8.54- -4.25  | -2.52- -1.91       | <b>3</b>  |
| <b>4</b>  | 2.0847-2.1242 | 3.8783-4.2561 | 7         | 314.86-328.02              | 28-32                 | -4.24- -2.24  | -1.90- -0.78       | <b>4</b>  |
| <b>5</b>  | 2.1243-2.2337 | 4.2562-4.8558 | 8         | 328.03-347.98              | 33-34                 | -2.23- -0.99  | -0.77- -0.08       | <b>5</b>  |
| <b>6</b>  | 2.2338-2.9854 | 4.8559-5.8047 | 9-10      | 347.99-382.29              | 35-38                 | -0.98-0.19    | -0.07-0.62         | <b>6</b>  |
| <b>7</b>  | 2.9855-5.1967 | 5.8048-6.6628 | 11        | 382.30-415.60              | 39-42                 | 0.20-1.17     | 0.63-1.44          | <b>7</b>  |
| <b>8</b>  | 5.1968-6.6663 | 6.6629-7.2813 | 12-13     | 415.61-447.02              | 43-46                 | 1.18-2.20     | 1.45-2.15          | <b>8</b>  |
| <b>9</b>  | 6.6664-7.1996 | 7.2814-7.8747 | 14        | 447.03-486.02              | 47-49                 | 2.21-2.84     | 2.16-3.02          | <b>9</b>  |
| <b>10</b> | 7.1997-7.7081 | 7.8748-8.2511 | ---       | 486.03-524.13              | 50-53                 | 2.85-3.45     | 3.03-3.72          | <b>10</b> |
| <b>11</b> | 7.7082-8.0149 | 8.2512-8.6100 | 15-16     | 524.14-553.85              | 54-56                 | 3.46-3.92     | 3.73-4.28          | <b>11</b> |
| <b>12</b> | 8.0150-8.3414 | 8.6101-8.8794 | 17        | 553.86-581.33              | 57-60                 | 3.93-4.52     | 4.29-5.01          | <b>12</b> |
| <b>13</b> | 8.3415-8.6681 | 8.8795-9.2239 | 18        | 581.34-614.50              | 61-63                 | 4.53-5.21     | 5.02-5.59          | <b>13</b> |
| <b>14</b> | 8.6682-8.9667 | 9.2240-9.4928 | 19        | 614.51-647.19              | 64-66                 | 5.22-5.84     | 5.60-5.91          | <b>14</b> |
| <b>15</b> | 8.9668-9.2697 | 9.4929-9.6015 | 20-21     | 647.20-679.22              | 67-70                 | 5.85-6.68     | 5.92-6.32          | <b>15</b> |
| <b>16</b> | 9.2698-9.5231 | 9.6016-9.7463 | 22        | 679.23-700.22              | 71-72                 | 6.69-7.60     | 6.33-6.95          | <b>16</b> |
| <b>17</b> | 9.5232-9.7529 | 9.7464-9.9189 | 23-24     | 700.23-727.13              | 73-75                 | 7.61-10.26    | 6.96-7.80          | <b>17</b> |
| <b>18</b> | 9.7530-9.8465 | 9.9190-10.0   | 25        | 727.14-777.13              | 76-80                 | 10.27-12.97   | 7.81-10.38         | <b>18</b> |
| <b>19</b> | 9.8466-10.0   | ---           | 26        | 777.14-800.0               | 81-130                | 12.98-15.0    | 10.39-15.0         | <b>19</b> |

**Raw Score indicates:**

DCCS – computed score

Picture Sequence Memory – computed score

Pattern Comparison – raw score

Picture Vocabulary – theta score

Flanker – computed score

List Sort – raw score

Oral Reading – theta score

**Appendix 1. NIH Toolbox Cognition Battery in Spanish Raw to Scaled Score Conversions.**

**Raw to Scaled Score for use in Age- and Fully-corrected Formulas**

**Spanish Children (3-7 years old)**

| SS        | DCCS          | Flanker       | List Sort | Picture Sequence<br>Memory | Pattern<br>Comparison | Oral Reading   | Picture Vocabulary | SS        |
|-----------|---------------|---------------|-----------|----------------------------|-----------------------|----------------|--------------------|-----------|
| <b>1</b>  | 0.0-0.0450    | 0.0-0.1431    | ---       | 200.0-203.78               | 0-9                   | -15.0- -14.38  | -15.0- -8.09       | <b>1</b>  |
| <b>2</b>  | 0.0451-0.1006 | 0.1432-0.3668 | ---       | 203.79-209.85              | 10-17                 | -14.37- -12.25 | -8.08- -7.32       | <b>2</b>  |
| <b>3</b>  | 0.1007-0.1699 | 0.3669-0.5851 | ---       | 209.86-222.41              | 18-19                 | -12.24- -10.74 | -7.31- -6.74       | <b>3</b>  |
| <b>4</b>  | 0.1700-0.2501 | 0.5852-0.7633 | 0         | 222.42-234.92              | 20                    | -10.73- -10.06 | -6.73- -6.00       | <b>4</b>  |
| <b>5</b>  | 0.2502-0.3711 | 0.7634-1.0106 | 1         | 234.93-265.17              | 21-22                 | -10.05- -9.42  | -5.99- -5.57       | <b>5</b>  |
| <b>6</b>  | 0.3712-0.5848 | 1.0107-1.2479 | 2-3       | 265.18-278.30              | 23                    | -9.41- -9.38   | -5.56- -5.05       | <b>6</b>  |
| <b>7</b>  | 0.5849-0.7446 | 1.2480-1.4969 | 4         | 278.31-299.61              | 24-27                 | -9.37- -8.63   | -5.04- -4.31       | <b>7</b>  |
| <b>8</b>  | 0.7447-0.9366 | 1.4970-1.8443 | 5         | 299.62-331.60              | 28-30                 | -8.62- -8.05   | -4.30- -3.69       | <b>8</b>  |
| <b>9</b>  | 0.9367-2.1315 | 1.8444-2.1975 | 6         | 331.61-349.97              | 31-35                 | -8.04- -6.67   | -3.68- -2.89       | <b>9</b>  |
| <b>10</b> | 2.1316-3.4622 | 2.1976-4.9949 | 7-8       | 349.98-385.62              | 36-38                 | -6.66- -5.25   | -2.88- -2.19       | <b>10</b> |
| <b>11</b> | 3.4623-4.9085 | 4.9950-5.8689 | 9         | 385.63-416.84              | 39-41                 | -5.24- -4.46   | -2.18- -1.69       | <b>11</b> |
| <b>12</b> | 4.9086-6.1072 | 5.8690-6.6244 | 10        | 416.85-454.97              | 42-44                 | -4.45- -3.48   | -1.68- -1.22       | <b>12</b> |
| <b>13</b> | 6.1073-6.4982 | 6.6245-7.1510 | 11-12     | 454.98-470.93              | 45-47                 | -3.47- -2.40   | -1.21- -0.71       | <b>13</b> |
| <b>14</b> | 6.4983-6.8405 | 7.1511-7.5392 | 13        | 470.94-480.85              | 48-51                 | -2.39- -1.12   | -0.70- -0.09       | <b>14</b> |
| <b>15</b> | 6.8406-7.2028 | 7.5393-7.8889 | 14        | 480.86-489.49              | 52-53                 | -1.11- -0.37   | -0.08-0.42         | <b>15</b> |
| <b>16</b> | 7.2029-7.6234 | 7.8890-8.3210 | 15-16     | 489.50-518.13              | 54-55                 | -0.36-0.53     | 0.43-1.04          | <b>16</b> |
| <b>17</b> | 7.6235-8.7665 | 8.3211-8.5352 | 17        | 518.14-538.41              | 56-59                 | 0.54-1.81      | 1.05-1.24          | <b>17</b> |
| <b>18</b> | 8.7666-9.5623 | 8.5353-9.3765 | 18-23     | 538.42-567.40              | 60-72                 | 1.82-10.17     | 1.25-2.32          | <b>18</b> |
| <b>19</b> | 9.5624-10.0   | 9.3766-10.0   | 24-26     | 567.41-800.0               | 73-130                | 10.18-15.0     | 2.33-15.0          | <b>19</b> |

**Raw Score indicates:**

DCCS – computed score

Picture Sequence Memory – computed score

Pattern Comparison – raw score

Picture Vocabulary – theta score

Flanker – computed score

List Sort – raw score

Oral Reading – theta score

## Appendix 2. NIH Toolbox Cognition Battery in Spanish Normative Formulas.

### Appendix 2.1 Formula Converting Raw scores to Uncorrected Normally-distributed Standard Scores.

| Test                    | Formula                                                                                                                                     |
|-------------------------|---------------------------------------------------------------------------------------------------------------------------------------------|
| DCCS                    | $\{[(\text{DCCS raw score}) - (4.89)] / 2.93\} * 15 + 100$                                                                                  |
| Flanker                 | $\{[(\text{Flanker raw score}) - (5.81)] / 2.77\} * 15 + 100$                                                                               |
| List Sort               | $\{[(\text{List Sort raw score}) - (11.37)] / 5.09\} * 15 + 100$                                                                            |
| Picture Sequence Memory | $\{[(\text{Picture Sequence Memory raw score}) - (432.24)] / 107.60\} * 15 + 100$                                                           |
| Pattern Comparison      | $\{[(\text{Pattern Comparison raw score}) - (43.55)] / 12.56\} * 15 + 100$                                                                  |
| Oral Reading            | $\{[(\text{Oral Reading raw score}) - (-2.97)] / 6.27\} * 15 + 100$                                                                         |
| Picture Vocabulary      | $\{[(\text{Picture Vocabulary raw score}) - (-0.06)] / 3.52\} * 15 + 100$                                                                   |
| Fluid Composite         | $[(\text{Mean of DCC, Flanker, List Sort, Pic Seq Mem, \& Pattern Comparison Uncorrected Standard Scores}) - 100.47] / (13.34)] * 15 + 100$ |
| Crystallized Composite  | $[(\text{Mean of Oral Reading \& Picture Vocabulary Uncorrected Standard Scores}) - 100.50] / (14.48)] * 15 + 100$                          |
| Total Composite         | $[(\text{Mean of Uncorrected Fluid \& Crystallized Composite Standard Scores}) - 103.86] / (12.81)] * 15 + 100$                             |

### Appendix 2.2 Formulas Converting Scaled Scores to Age-Corrected Standard Scores

| Test                  | Formula                                                                                                                      |
|-----------------------|------------------------------------------------------------------------------------------------------------------------------|
| <b>Spanish Adults</b> |                                                                                                                              |
| DCCS                  | $100 + 15 * \{[(\text{DCCS scaled score}) - (13.48 - 7.84*(\text{age}/100))] / [2.52 - 1.11*(\text{age}/100)]\} / 1.30$      |
| Flanker               | $100 + 15 * \{[(\text{Flanker scaled score}) - (13.91 - 8.89*(\text{age}/100))] / [1.87 + 0.52*(\text{age}/100)]\} / 1.25$   |
| List Sort             | $100 + 15 * \{[(\text{List Sort scaled score}) - (13.37 - 7.97*(\text{age}/100))] / [2.78 - 1.31*(\text{age}/100)]\} / 1.26$ |
| Picture Sequence      | $100 + 15 * \{[(\text{Picture Sequence Memory scaled score}) - (13.40 - 8.57*(\text{age}/100))] /$                           |

## Appendix 2. NIH Toolbox Cognition Battery in Spanish Normative Formulas.

|                           |                                                                                                                                                                                                       |
|---------------------------|-------------------------------------------------------------------------------------------------------------------------------------------------------------------------------------------------------|
| Memory                    | $[2.66 - 1.27 * (\text{age}/100)] / 1.27$                                                                                                                                                             |
| Pattern Comparison        | $100 + 15 * \{[(\text{Pattern comp scaled score}) - (13.97 - 9.07 * (\text{age}/100))] / [2.44 - 0.78 * (\text{age}/100)]\} / 1.26$                                                                   |
| Oral Reading              | $100 + 15 * \{[(\text{Reading scaled score}) - (11.95 - 4.43 * (\text{age}/100))] / [1.96 + 0.81 * (\text{age}/100)]\} / 1.26$                                                                        |
| Picture Vocabulary        | $100 + 15 * \{[(\text{Vocabulary scaled score}) - (3.90 + 32.00 * (\text{age}/100) - 36.02 * (\text{age}/100)^2)] / [1.45 + 1.78 * (\text{age}/100)]\} / 1.25$                                        |
| Fluid Composite           | $100 + 15 * \{[(\text{Mean of DCC, Flanker, List Sort, Pic Seq Mem, \& Pattern Comparison Scaled Scores}) - (13.36 - 7.41 * (\text{age}/100))] / [1.64 - 0.31 * (\text{age}/100)]\} / 1.26$           |
| Crystallized Composite    | $100 + 15 * \{[(\text{Mean of Oral Reading \& Picture Vocabulary Scaled Scores}) - (3.02 + 16.27 * (\text{age}/100)^{0.5} - 16.23 * (\text{age}/100)^2)] / [1.70 + 0.74 * (\text{age}/100)]\} / 1.24$ |
| Total Cognition Composite | $100 + 15 * \{[(\text{Mean of Fluid \& Crystallized Composite Scaled Scores}) - (12.04 - 4.30 * (\text{age}/100))] / [1.11 + 0.84 * (\text{age}/100)]\} / 1.28$                                       |
| <b>Spanish Children</b>   |                                                                                                                                                                                                       |
| DCCS                      | $100 + 15 * \{[(\text{DCCS scaled score}) - (4.04 + 11.68 * (\text{age}/10))] / [1.86 + 0.32 * (\text{age}/10)]\} / 1.25$                                                                             |
| Flanker                   | $100 + 15 * \{[(\text{Flanker scaled score}) - (2.76 + 14.10 * (\text{age}/10))] / [1.83 - 0.12 * (\text{age}/10)]\} / 1.30$                                                                          |
| List Sort                 | $100 + 15 * \{[(\text{List Sort scaled score}) - (3.04 + 12.79 * (\text{age}/10))] / [2.03 - 0.18 * (\text{age}/10)]\} / 1.26$                                                                        |
| Picture Sequence Memory   | $100 + 15 * \{[(\text{Picture Sequence Memory scaled score}) - (14.93 + 6.86 * \log(\text{age}/10))] / [1.49 + 0.63 * (\text{age}/10)]\} / 1.23$                                                      |
| Pattern Comparison        | $100 + 15 * \{[(\text{Pattern Comp scaled score}) - (3.36 + 12.88 * (\text{age}/10))] / [2.87 - 2.07 * (\text{age}/10)]\} / 1.32$                                                                     |
| Oral Reading              | $100 + 15 * \{[(\text{Reading scaled score}) - (3.69 + 10.95 * (\text{age}/10))] / [1.51 + 1.13 * (\text{age}/10)]\} / 1.23$                                                                          |
| Picture Vocabulary        | $100 + 15 * \{[(\text{Vocabulary scaled score}) - (3.84 + 12.48 * (\text{age}/10))] / [2.16 -$                                                                                                        |

## Appendix 2. NIH Toolbox Cognition Battery in Spanish Normative Formulas.

|                           |                                                                                                                                                                               |
|---------------------------|-------------------------------------------------------------------------------------------------------------------------------------------------------------------------------|
|                           | $0.59*(age/10)] / 1.30$                                                                                                                                                       |
| Fluid Composite           | $100 + 15 * \{[(Mean\ of\ DCC,\ Flanker,\ List\ Sort,\ Pic\ Seq\ Mem,\ \&\ Pattern\ Comparison\ Scaled\ Scores) - (3.53 + 12.82*(age/10))] / [1.11 + 0.11*(age/10)]\} / 1.23$ |
| Crystallized Composite    | $100 + 15 * \{[(Mean\ of\ Oral\ Reading\ \&\ Picture\ Vocabulary\ Scaled\ Scores) - (4.35 + 10.99*(age/10))] / [2.12 - 0.75*(age/10)]\} / 1.26$                               |
| Total Cognition Composite | $100 + 15 * \{[(Mean\ of\ Fluid\ \&\ Crystallized\ Composite\ Scaled\ Scores) - (5.27 + 9.91*(age/10))] / [1.51 - 0.55*(age/10)]\} / 1.22$                                    |

## Appendix 2.3 Formulas Converting Scaled Scores to Fully-Corrected T-Scores.

| Test                    | Formula                                                                                                                                                                                               |
|-------------------------|-------------------------------------------------------------------------------------------------------------------------------------------------------------------------------------------------------|
| <b>Spanish Adults</b>   |                                                                                                                                                                                                       |
| DCCS                    | $50 + 10 * \{[(DCCS\ scaled\ score) - (11.00 - 7.24*(age/100) + 1.27*((edu+1)/10)^2 + 0.61*male)] / [1.56 - 0.18*(age/100) + 0.16*((edu+1)/10) + 0.34*male]\} / 1.30$                                 |
| Flanker                 | $50 + 10 * \{[(Flanker\ scaled\ score) - (10.16 - 7.95*(age/100) + 2.64*((edu+1)/10) + 0.70*male)] / [1.25 + 0.63*(age/100) + 0.14*((edu+1)/10) + 0.46*male]\} / 1.26$                                |
| List Sort               | $50 + 10 * \{[(List\ Sort\ scaled\ score) - (10.68 - 7.14*(age/100) + 1.95*((edu+1)/10) + 0.05*male)] / [2.55 - 1.20*(age/100) + 0.08*((edu+1)/10) - 0.03*male]\} / 1.26$                             |
| Picture Sequence Memory | $50 + 10 * \{[(Picture\ Sequence\ Memory\ scaled\ score) - (9.95 - 7.34*(age/100) + 2.51*((edu+1)/10) - 0.45*male)] / [2.68 - 0.89*(age/100) - 0.29*((edu+1)/10) + 0.16*male]\} / 1.28$               |
| Pattern Comparison      | $50 + 10 * \{[(Pattern\ Comp\ scaled\ score) - (11.98 - 8.68*(age/100) + 1.41*((edu+1)/10) + 0.46*male)] / [1.34 - 0.35*(age/100) + 0.67*((edu+1)/10) + 0.15*male]\} / 1.25$                          |
| Oral Reading            | $50 + 10 * \{[(Reading\ scaled\ score) - (9.37 - 3.65*(age/100) + 1.86*((edu+1)/10) + 0.09*male)] / [3.21 + 0.46*(age/100) + 0.04*((edu+1)/10)^{-2} - 1.49*((edu+1)/10)^{-0.5} + 0.54*male]\} / 1.23$ |
| Picture Vocabulary      | $50 + 10 * \{[(Vocabulary\ scaled\ score) - (1.71 + 28.94*(age/100) - 31.60*(age/100)^2 + 2.23*((edu+1)/10) - 0.20*male)] / [0.64 + 1.74*(age/100) + 0.49*((edu+1)/10) +$                             |

## Appendix 2. NIH Toolbox Cognition Battery in Spanish Normative Formulas.

|                           |                                                                                                                                                                                                                                                                                                                                             |
|---------------------------|---------------------------------------------------------------------------------------------------------------------------------------------------------------------------------------------------------------------------------------------------------------------------------------------------------------------------------------------|
|                           | $0.39 * \text{male}] / 1.25$                                                                                                                                                                                                                                                                                                                |
| Fluid Composite           | $50 + 10 * \{[(\text{Mean of DCC, Flanker, List Sort, Pic Seq Mem, \& Pattern Comparison Scaled Scores}) - (9.79 - 6.58 * (\text{age}/100) + 2.55 * ((\text{edu}+1)/10) + 0.33 * \text{male})] / [1.57 - 0.33 * (\text{age}/100) - 0.14 * ((\text{edu}+1)/10) + 0.12 * \text{male}]\} / 1.25$                                               |
| Crystallized Composite    | $50 + 10 * \{[(\text{Mean of Oral Reading \& Picture Vocabulary Scaled Scores}) - (5.09 + 15.77 * (\text{age}/100) - 19.13 * (\text{age}/100)^2 + 1.90 * ((\text{edu}+1)/10) - 0.03 * \text{male})] / [2.66 + 0.73 * (\text{age}/100) + 0.04 * ((\text{edu}+1)/10)^{-2} - 1.32 * ((\text{edu}+1)/10)^{-0.5} + 0.44 * \text{male}]\} / 1.23$ |
| Total Cognition Composite | $50 + 10 * \{[(\text{Mean of Fluid \& Crystallized Composite Scaled Scores}) - (8.46 - 3.30 * (\text{age}/100) + 2.55 * ((\text{edu}+1)/10) + 0.08 * \text{male})] / [1.09 + 0.49 * (\text{age}/100) - 0.10 * ((\text{edu}+1)/10) + 0.20 * \text{male}]\} / 1.26$                                                                           |
| <b>Spanish Children</b>   |                                                                                                                                                                                                                                                                                                                                             |
| DCCS                      | $50 + 10 * \{[(\text{DCCS scaled score}) - (2.91 + 11.80 * (\text{age}/10) + 1.13 * ((\text{edu}+1)/10) - 0.28 * \text{male})] / [1.68 + 0.31 * (\text{age}/10) + 0.11 * ((\text{edu}+1)/10) + 0.03 * \text{male}]\} / 1.26$                                                                                                                |
| Flanker                   | $50 + 10 * \{[(\text{Flanker scaled score}) - (1.97 + 14.23 * (\text{age}/10) + 0.61 * ((\text{edu}+1)/10) + 0.14 * \text{male})] / [1.73 - 0.06 * (\text{age}/10) + 0.03 * ((\text{edu}+1)/10) + 0.08 * \text{male}]\} / 1.29$                                                                                                             |
| List Sort                 | $50 + 10 * \{[(\text{List Sort scaled score}) - (2.10 + 13.09 * (\text{age}/10) + 0.97 * ((\text{edu}+1)/10) - 0.55 * \text{male})] / [1.72 - 0.07 * (\text{age}/10) + 0.06 * ((\text{edu}+1)/10) + 0.34 * \text{male}]\} / 1.26$                                                                                                           |
| Picture Sequence Memory   | $50 + 10 * \{[(\text{Picture Sequence Memory scaled score}) - (2.07 + 14.20 * (\text{age}/10) + 0.50 * ((\text{edu}+1)/10) + 0.33 * \text{male})] / [1.14 + 0.78 * (\text{age}/10) + 0.30 * ((\text{edu}+1)/10) - 0.17 * \text{male}]\} / 1.25$                                                                                             |
| Pattern Comparison        | $50 + 10 * \{[(\text{Pattern Comp scaled score}) - (2.90 + 12.94 * (\text{age}/10) + 0.32 * ((\text{edu}+1)/10) + 0.21 * \text{male})] / [3.45 - 2.20 * (\text{age}/10) - 0.58 * ((\text{edu}+1)/10) + 0.21 * \text{male}]\} / 1.33$                                                                                                        |
| Oral Reading              | $50 + 10 * \{[(\text{Reading scaled score}) - (3.33 + 11.10 * (\text{age}/10) + 0.35 * ((\text{edu}+1)/10) - 0.24 * \text{male})] / [1.48 + 1.02 * (\text{age}/10) + 0.13 * ((\text{edu}+1)/10) - 0.11 * \text{male}]\} / 1.22$                                                                                                             |
| Picture Vocabulary        | $50 + 10 * \{[(\text{Vocabulary scaled score}) - (3.74 + 12.51 * (\text{age}/10) + 0.43 * ((\text{edu}+1)/10) - 0.78 * \text{male})] / [1.96 - 0.41 * (\text{age}/10) + 0.09 * ((\text{edu}+1)/10) - 0.04 * \text{male}]\} / 1.31$                                                                                                          |
| Fluid Composite           | $50 + 10 * \{[(\text{Mean of DCC, Flanker, List Sort, Pic Seq Mem, \& Pattern Comparison$                                                                                                                                                                                                                                                   |

## Appendix 2. NIH Toolbox Cognition Battery in Spanish Normative Formulas.

|                           |                                                                                                                                                                                                                                                                                                 |
|---------------------------|-------------------------------------------------------------------------------------------------------------------------------------------------------------------------------------------------------------------------------------------------------------------------------------------------|
|                           | $\text{Scaled Scores} - (2.51 + 13.03 \cdot (\text{age}/10) + 0.89 \cdot ((\text{edu}+1)/10) - 0.12 \cdot \text{male}) / [1.11 + 0.24 \cdot (\text{age}/10) - 0.07 \cdot ((\text{edu}+1)/10) - 0.04 \cdot \text{male}] / 1.22$                                                                  |
| Crystallized Composite    | $50 + 10 \cdot \{[(\text{Mean of Oral Reading \& Picture Vocabulary Scaled Scores}) - (3.81 + 11.22 \cdot (\text{age}/10) + 0.56 \cdot ((\text{edu}+1)/10) - 0.48 \cdot \text{male})] / [1.72 - 0.55 \cdot (\text{age}/10) + 0.24 \cdot ((\text{edu}+1)/10) + 0.06 \cdot \text{male}]\} / 1.24$ |
| Total Cognition Composite | $50 + 10 \cdot \{[(\text{Mean of Fluid \& Crystallized Composite Scaled Scores}) - (4.66 + 10.23 \cdot (\text{age}/10) + 0.50 \cdot ((\text{edu}+1)/10) - 0.28 \cdot \text{male})] / [1.58 - 0.64 \cdot (\text{age}/10) - 0.03 \cdot ((\text{edu}+1)/10) + 0.03 \cdot \text{male}]\} / 1.22$    |
